# Supplementary material
Source: ML conference proceedings conference paper supplement (https://proceedings.mlr.press/v130/bechavod21a.html)
Supplement: Supplementary file 1 [file bechavod21a-supp.pdf]

## A Proof of Theorem 4.1

### A.1 Preliminaries

#### A.1.1 Useful concentration

Our proof will require applying the following concentration inequality, derived from Azuma's inequality:

**Lemma A.1.** *Let  $W_1, \dots, W_\tau$  be random variables in  $\mathbb{R}$  such that  $|W_t| \leq W_{max}$ . Suppose for all  $t \in [\tau]$ , for all  $w_1, \dots, w_{t-1}$ ,*

$$\mathbb{E}[W_t | W_{t-1} = w_{t-1}, \dots, W_1 = w_1] = 0.$$

Then, with at least  $1 - \delta$ ,

$$\left| \sum_{t=1}^{\tau} W_t \right| \leq W_{max} \sqrt{2\tau \log(2/\delta)}.$$

*Proof.* This is a reformulated version of Azuma's inequality. To see this, define

$$Z_t = \sum_{i=1}^t W_i \quad \forall t,$$

and initialize  $Z_0 = 0$ . We start by noting that for all  $t \in [\tau]$ , since

$$Z_t = \sum_{i=1}^t W_i = W_t + \sum_{i=1}^{t-1} W_i = W_t + Z_{t-1},$$

we have

$$\begin{aligned} \mathbb{E}[Z_t | Z_{t-1}, \dots, Z_1] &= \mathbb{E}[W_t | Z_{t-1}, \dots, Z_1] + \mathbb{E}[Z_{t-1} | Z_{t-1}, \dots, Z_1] \\ &= \mathbb{E}[W_t | Z_{t-1}, \dots, Z_1] + Z_{t-1}. \end{aligned}$$

Further, it is easy to see that  $Z_i = z_i \forall i \in [t-1]$  if and only if  $W_i = z_i - z_{i-1} \forall i \in [t-1]$ , hence

$$\mathbb{E}[W_t | Z_{t-1} = z_{t-1}, \dots, Z_1 = z_1] = \mathbb{E}[W_t | W_i = z_i - z_{i-1} \forall i \in [t-1]] = 0.$$

Combining the last two equations implies that

$$\mathbb{E}[Z_t | Z_{t-1}, \dots, Z_1] = Z_{t-1},$$

and the  $Z_t$ 's define a martingale. Since for all  $t$ ,

$$|Z_t - Z_{t-1}| = |W_t| \leq W_{max},$$

we can apply Azuma's inequality to show that with probability at least  $1 - \delta$ ,

$$|Z_\tau - Z_0| \geq W_{max} \sqrt{2\tau \log(2/\delta)},$$

which immediately gives the result.  $\square$

#### A.1.2 Sub-space decomposition and projection

We will also need to divide  $\mathbb{R}^d$  in several sub-spaces, and project our observations to said subspaces.

**Sub-space decomposition** We focus on the sub-space generated by the non-modified features  $x_t$ 's and the sub-space generated by the feature modifications  $\Delta_t$ 's. We let  $r$  be the rank of  $\Sigma$ , and let  $\lambda_r \geq \dots \geq \lambda_1 > 0$  be the non-zero eigenvalues of  $\Sigma$ . Further, we let  $f_1, \dots, f_r$  be the unit eigenvectors (i.e., such that  $\|f_1\|_1 = \dots = \|f_r\|_1 = 1$ ) corresponding to eigenvalues  $\lambda_1, \dots, \lambda_r$  of  $\Sigma$ . As  $\Sigma$  is a symmetric matrix,  $f_1, \dots, f_r$  are orthonormal. We abuse notations in the proof of Theorem 4.1 and denote  $\Sigma = \text{span}(f_1, \dots, f_r)$  when clear from context.

For all  $k$ , let  $e_k$  be the unit vector such that  $e_k(k) = 1$  and  $e_k(j) = 0 \forall j \neq k$ . At time  $\tau$ , we denote  $\mathcal{D}_\tau = \text{span}(e_k)_{k \in D_\tau}$  the sub-space of  $\mathbb{R}^d$  spanned by the features in  $D_\tau$ .

Finally, we let

$$\mathcal{V}_\tau = \Sigma + \mathcal{D}_\tau = \text{span}(f_1, \dots, f_r) + \text{span}(e_k)_{k \in D_\tau}$$

be the Minkowski sum of sub-spaces  $\Sigma$  and  $\mathcal{D}_\tau$ .

**Projection onto sub-spaces** For any vector  $z$ , sub-space  $\mathcal{H}$  of  $\mathbb{R}^d$ , we write  $z = z(\mathcal{H}) + z(\mathcal{H}^\perp)$  where  $z(\mathcal{H})$  is the projection of  $z$  onto sub-space  $\mathcal{H}$ , i.e. is uniquely defined as

$$z(\mathcal{H}) = \sum_{q \in B} (z^\top q) q$$

for any orthonormal basis  $B$  of  $\mathcal{H}$ . We also let  $z(\mathcal{H}^\perp)$  be the projection on the orthogonal complement  $\mathcal{H}^\perp$ . In particular,  $z(\mathcal{H})$  is orthogonal to  $z(\mathcal{H}^\perp)$ . Further, we write  $\bar{X}_\tau(\mathcal{H})$  the matrix whose rows are given by  $\bar{x}_t(\mathcal{H})^\top$  for all  $t \in [\tau]$ .

## A.2 Main Proof

**Characterization of the least-square estimate via first-order conditions** First, for any least square solution  $\hat{\beta}_E$  at time  $\tau(E)$ , we write the first order conditions solved by  $\hat{\beta}_E(\mathcal{V}_{\tau(E)})$ , the projection of  $\hat{\beta}_E$  on sub-space  $\mathcal{V}_{\tau(E)}$ . We abuse notations to let  $\varepsilon_{\tau(E)} \triangleq (\varepsilon_t)_{t \in [\tau(E)]}$  the vector of all  $\varepsilon_t$ 's up until time  $\tau(E)$ , and state the result as follows:

**Lemma A.2** (First-order conditions projected onto  $\mathcal{V}_{\tau(E)}$ ). *Suppose  $\hat{\beta}_E \in LSE(\tau(E))$ . Then,*

$$\left( \bar{X}_{\tau(E)}(\mathcal{V}_{\tau(E)})^\top \bar{X}_{\tau(E)}(\mathcal{V}_{\tau(E)}) \right) \left( \hat{\beta}_E(\mathcal{V}_{\tau(E)}) - \beta^*(\mathcal{V}_{\tau(E)}) \right) = \bar{X}_{\tau(E)}(\mathcal{V}_{\tau(E)})^\top \varepsilon_{\tau(E)}.$$

*Proof.* For simplicity of notations, we drop all  $\tau(E)$  indices and subscripts in this proof. Remember that

$$LSE = \underset{\beta}{\operatorname{argmin}} (\bar{X}\beta - \bar{Y})^\top (\bar{X}\beta - \bar{Y}).$$

Since  $\hat{\beta}_E \in LSE$ , it must satisfy the first order conditions given by

$$2\bar{X}^\top (\bar{X}\hat{\beta}_E - \bar{Y}) = 0,$$

which can be rewritten as

$$\bar{X}^\top \bar{X}\hat{\beta}_E = \bar{X}^\top \bar{Y}.$$

Second, we note that for all  $t$ ,  $x_t \in \operatorname{span}(f_1, \dots, f_r)$  and  $\Delta_t \in \operatorname{span}((e_k)_{k \in D})$  (by definition of  $D$ ). This immediately implies, in particular, that  $\bar{x}_t = x_t + \Delta_t \in \mathcal{V}$ . In turn,  $\bar{x}_t(\mathcal{V}) = \bar{x}_t$  for all  $t$ , and

$$\bar{X} = \bar{X}(\mathcal{V}).$$

As such, the first order condition can be written

$$\bar{X}(\mathcal{V})^\top \bar{X}(\mathcal{V})\hat{\beta}_E = \bar{X}(\mathcal{V})^\top \bar{Y}.$$

Now, we remark that

$$\begin{aligned} \bar{X}(\mathcal{V})^\top \bar{X}(\mathcal{V})\hat{\beta}_E &= \sum_{t \in S} \bar{x}_t(\mathcal{V}) \bar{x}_t(\mathcal{V})^\top \hat{\beta}_E \\ &= \sum_{t \in S} \bar{x}_t(\mathcal{V}) \bar{x}_t(\mathcal{V})^\top \hat{\beta}_E(\mathcal{V}) + \sum_{t \in S} \bar{x}_t(\mathcal{V}) \bar{x}_t(\mathcal{V})^\top \hat{\beta}_E(\mathcal{V}^\perp) \\ &= \sum_{t \in S} \bar{x}_t(\mathcal{V}) \bar{x}_t(\mathcal{V})^\top \hat{\beta}_E(\mathcal{V}) \\ &= \bar{X}(\mathcal{V})^\top \bar{X}(\mathcal{V})\hat{\beta}_E(\mathcal{V}), \end{aligned}$$

where the second-to-last equality follows from the fact that  $\mathcal{V}$  and  $\mathcal{V}^\perp$  are orthogonal, which immediately implies  $\bar{x}_t(\mathcal{V})^\top \hat{\beta}_E(\mathcal{V}^\perp) = 0$  for all  $t$ . To conclude the proof, we note that  $\bar{Y} = \bar{X}^\top \beta^* + \varepsilon = \bar{X}(\mathcal{V})^\top \beta^*(\mathcal{V}) + \varepsilon$ . Plugging this in the above equation, we obtain that

$$\bar{X}(\mathcal{V})^\top \bar{X}(\mathcal{V})\hat{\beta}_E(\mathcal{V}) = \bar{X}(\mathcal{V})^\top \bar{X}(\mathcal{V})^\top \beta^*(\mathcal{V}) + \bar{X}(\mathcal{V})^\top \varepsilon.$$

This can be rewritten

$$\left( \bar{X}(\mathcal{V})^\top \bar{X}(\mathcal{V}) \right) \left( \hat{\beta}_E(\mathcal{V}) - \beta^*(\mathcal{V}) \right) = \bar{X}(\mathcal{V})^\top \varepsilon,$$

which completes the proof.  $\square$

**Upper-bounding the right-hand side of the first order conditions** We now use concentration to give an upper bound on a function of the right-hand side of the first order conditions,

$$\left(\hat{\beta}_E(\mathcal{V}_{\tau(E)}) - \beta^*(\mathcal{V}_{\tau(E)})\right)^\top \bar{X}_{\tau(E)}(\mathcal{V}_{\tau(E)})^\top \varepsilon_{\tau(E)}.$$

**Lemma A.3.** *With probability at least  $1 - \delta$ ,*

$$\begin{aligned} & \left(\hat{\beta}_E(\mathcal{V}_{\tau(E)}) - \beta^*(\mathcal{V}_{\tau(E)})\right)^\top \bar{X}_{\tau(E)}(\mathcal{V}_{\tau(E)})^\top \varepsilon \\ & \leq \left\| \hat{\beta}_E(\mathcal{V}_{\tau(E)}) - \beta^*(\mathcal{V}_{\tau(E)}) \right\|_2 \cdot K' \sqrt{d\tau(E) \log(2d/\delta)}. \end{aligned}$$

where  $K'$  is a constant that only depends on the distribution of costs and the bound  $\sigma$  on the noise.

*Proof.* Pick any  $k \in [d]$ , and define  $W_t = \bar{x}_t(k)\varepsilon_t$ . First, we remark that

$$|\bar{x}_t(k)| \leq |x_t(k)| + |\Delta_t(k)| \leq 1 + \max_{k \in [d], i \in [l]} \frac{B^i}{c^i(k)}.$$

In turn,  $|W_t| \leq K'$  where

$$K' \triangleq \left(1 + \max_{k \in [d], i \in [l]} \frac{B^i}{c^i(k)}\right) \sigma.$$

Further, note that both  $x_t(k)$  and  $\varepsilon_t$  are independent of the history of play up through time  $t - 1$ , hence of  $W_1, \dots, W_{t-1}$ , and that  $\varepsilon_t$  is further independent of  $\Delta_t$  (the distribution of  $\Delta_t$  is a function of the currently posted  $\hat{\beta}_{E-1}$  only, which only depends on the previous time steps). Noting that if  $A, B, C$  are random variables, we have

$$\begin{aligned} \mathbb{E}_{A,B} [AB|C = c] &= \sum_a \sum_b ab \Pr[A = a, B = b|C = c] \\ &= \sum_a \sum_b ab \Pr[A = a|B = b, C = c] \Pr[B = b|C = c] \\ &= \sum_b b \left( \sum_a a \Pr[A = a|B = b, C = c] \right) \Pr[B = b|C = c] \\ &= \sum_b b \mathbb{E}_A [A|B = b, C = c] \Pr[B = b|C = c] \\ &= \mathbb{E}_B \left[ \mathbb{E}_A [A|B, C = c] B|C = c \right], \end{aligned}$$

and applying this with  $A = \varepsilon_t$ ,  $B = \Delta_t(k)$ ,  $C = W_1 \cap \dots \cap W_{t-1}$ , we obtain

$$\begin{aligned} \mathbb{E}[W_t|W_{t-1}, \dots, W_1] &= \mathbb{E}[\bar{x}_t(k)\varepsilon_t|W_{t-1}, \dots, W_1] \\ &= \mathbb{E}[x_t(k)\varepsilon_t|W_{t-1}, \dots, W_1] + \mathbb{E}[\Delta_t(k)\varepsilon_t|W_{t-1}, \dots, W_1] \\ &= \mathbb{E}[x_t(k)\varepsilon_t] + \mathbb{E}_{\Delta_t} \left[ \mathbb{E}_{\varepsilon_t} [\varepsilon_t|\Delta_t(k), W_{t-1}, \dots, W_1] \cdot \Delta_t(k) \middle| W_{t-1}, \dots, W_1 \right] \\ &= \mathbb{E}_{x_t} \left[ x_t(k) \cdot \mathbb{E}_{\varepsilon} [\varepsilon_t|x_t(k)] \right] + \mathbb{E}_{\Delta_t} \left[ \Delta_t(k) \cdot \mathbb{E}_{\varepsilon_t} [\varepsilon_t] \middle| W_{t-1}, \dots, W_1 \right] \\ &= 0, \end{aligned}$$

since  $\mathbb{E}_{\varepsilon_t} [\varepsilon_t] = 0$  and  $\mathbb{E}_{\varepsilon} [\varepsilon_t|x_t(k)] = 0$ . Hence, we can apply Lemma A.1 and a union bound over all  $d$  features to show that with probability at least  $1 - \delta$ ,

$$\sum_{t=1}^{\tau(E)} \bar{x}_t(k)\varepsilon_t \geq -K' \sqrt{2\tau(E) \log(2d/\delta)} \quad \forall k \in [d].$$

By Cauchy-Schwarz, we have

$$\begin{aligned}
 \left( \hat{\beta}_E(\mathcal{V}) - \beta^*(\mathcal{V}) \right)^\top \sum_{t=1}^{\tau(E)} \bar{x}_t \varepsilon_t &\leq \left\| \hat{\beta}_E(\mathcal{V}) - \beta^*(\mathcal{V}) \right\|_2 \cdot \left\| \sum_{t=1}^{\tau(E)} \bar{x}_t \varepsilon_t \right\|_2 \\
 &\leq \left\| \hat{\beta}_E(\mathcal{V}) - \beta^*(\mathcal{V}) \right\|_2 \sqrt{\sum_{k=1}^d \left( \sum_t \bar{x}_t(k) \varepsilon_t \right)^2} \\
 &\leq \left\| \hat{\beta}_E(\mathcal{V}) - \beta^*(\mathcal{V}) \right\|_2 \cdot K' \sqrt{2d\tau(E) \log(2d/\delta)}.
 \end{aligned}$$

□

**Strong convexity of the mean-squared error in sub-space  $\mathcal{V}(\tau(E))$**  We give a lower bound on the eigenvalues of  $\bar{X}^\top \bar{X}$  on sub-space  $\mathcal{V}(\tau(E))$ , so as to show that at time  $\tau(E)$ , any least square solution  $\hat{\beta}_E$  satisfies

$$\begin{aligned}
 \left( \hat{\beta}_E(\mathcal{V}_{\tau(E)}) - \beta^*(\mathcal{V}_{\tau(E)}) \right)^\top \bar{X}_{\tau(E)}(\mathcal{V}_{\tau(E)})^\top \bar{X}_{\tau(E)}(\mathcal{V}_{\tau(E)}) \left( \hat{\beta}_E(\mathcal{V}_{\tau(E)}) - \beta^*(\mathcal{V}_{\tau(E)}) \right) \\
 \geq \Omega(n) \left\| \hat{\beta}_E(\mathcal{V}_{\tau(E)}) - \beta^*(\mathcal{V}_{\tau(E)}) \right\|_2^2.
 \end{aligned}$$

To do so, we will need the following concentration inequalities:

**Lemma A.4.** *Suppose  $\mathbb{E}[x_t] = 0$ . Fix  $\tau(E) = En$  for some  $E \in \mathbb{N}$ . With probability at least  $1 - \delta$ , we have that*

$$\sum_{t=1}^{\tau(E)} z^\top x_t x_t^\top z \geq \left( \lambda_r \tau(E) - 2rd\sqrt{\tau(E) \log(6r/\delta)} \right) \|z\|_2^2 \quad \forall z \in \Sigma,$$

and

$$\sum_{t=1}^{\tau(E)} z^\top \Delta_t \Delta_t^\top z \geq \left( \min_{i,k} \left\{ \pi^i \left( \frac{B^i}{c^i(k)} \right)^2 \right\} n - \left( \max_{i,k} \left\{ \frac{B^i}{c^i(k)} \right\} \right)^2 \sqrt{2n \log(6d/\delta)} \right) \|z\|_2^2 \quad \forall z \in \mathcal{D}_{\tau(E)}$$

and

$$\sum_{t=1}^{\tau(E)} z^\top x_t \Delta_t^\top z \geq -2 \max_{i,k} \left\{ \frac{B^i}{c^i(k)} \right\} d \sqrt{\tau(E) \log(6d/\delta)} \|z\|_2^2 \quad \forall z \in \mathbb{R}^d.$$

*Proof.* Deferred to Appendix A.2.1. □

We will also need the following statement on the norm of the projections of any  $z \in \mathcal{V}$  to  $\mathcal{D}$  and  $\Sigma$ :

**Lemma A.5.** *Let*

$$\begin{aligned}
 \lambda(\mathcal{D}, \Sigma) &= \inf_{z \in \mathcal{D} + \Sigma} \|z(\mathcal{D})\|_2 + \|z(\Sigma)\|_2 \\
 \text{s.t.} \quad &\|z\|_2 = 1.
 \end{aligned}$$

Then,  $\lambda(\mathcal{D}, \Sigma) > 0$ .

*Proof.* With respect to the Euclidean metric, the objective function is continuous in  $z$  (the orthogonal projection operators are linear hence continuous functions of  $z$  and  $z \rightarrow \|z\|_2$  also is a continuous function), and its feasible set is compact (as it is a sphere in a bounded-dimensional space over real values). By the extreme value theorem, the optimization problem admits an optimal solution, i.e., there exists  $z^*$  with  $\|z^*\|_2 = 1$  such that  $\lambda(\mathcal{D}, \Sigma) = \|z^*(\mathcal{D})\|_2 + \|z^*(\Sigma)\|_2$ . Now, supposing  $\lambda(\mathcal{D}, \Sigma) \leq 0$ , it must necessarily be the case that  $z(\mathcal{D}) = 0$ ,  $z(\Sigma) = 0$ . In particular, this means  $z$  is orthogonal to both  $\mathcal{D}$  and  $\Sigma$ . In turn,  $z$  must be orthogonal to every vector in  $\mathcal{D} + \Sigma$ ; since  $z \in \mathcal{D} + \Sigma$ , this is only possible when  $z = 0$ , contradicting  $\|z\|_2 = 1$ . □

We can now move onto the proof of our lower bound for

$$\left( \hat{\beta}_E(\mathcal{V}_{\tau(E)}) - \beta^*(\mathcal{V}_{\tau(E)}) \right)^\top \bar{X}_{\tau(E)}(\mathcal{V}_{\tau(E)})^\top \bar{X}_{\tau(E)}(\mathcal{V}_{\tau(E)}) \left( \hat{\beta}_E(\mathcal{V}_{\tau(E)}) - \beta^*(\mathcal{V}_{\tau(E)}) \right).$$

**Corollary A.6.** Fix  $\tau(E) = En$  for some  $E \in \mathbb{N}$ . With probability at least  $1 - \delta$ ,

$$\begin{aligned} & \left( \hat{\beta}_E(\mathcal{V}_{\tau(E)}) - \beta^*(\mathcal{V}_{\tau(E)}) \right)^\top \bar{X}_{\tau(E)}(\mathcal{V}_{\tau(E)})^\top \bar{X}_{\tau(E)}(\mathcal{V}_{\tau(E)}) \left( \hat{\beta}_E(\mathcal{V}_{\tau(E)}) - \beta^*(\mathcal{V}_{\tau(E)}) \right) \\ & \geq \left( \frac{\lambda n}{2} - \kappa' d^2 \sqrt{\tau(E) \log(6d/\delta)} \right) \left\| \hat{\beta}_E(\mathcal{V}_{\tau(E)}) - \beta^*(\mathcal{V}_{\tau(E)}) \right\|_2^2, \end{aligned}$$

for some constants  $\kappa'$ ,  $\lambda$  that only depend on  $\sigma$ ,  $\mathcal{C}$ , and  $\Sigma$ , with  $\lambda > 0$ .

*Proof.* Since it is clear from context, we drop all  $\tau(E)$  subscripts in the notation of this proof. First, we remark that

$$\begin{aligned} z^\top \bar{X}^\top \bar{X} z &= \sum_t z^\top \bar{x}_t \bar{x}_t^\top z \\ &= \sum_t z^\top x_t x_t^\top z + \sum_t z^\top \Delta_t \Delta_t^\top z + 2 \sum_t z^\top \Delta_t z^\top x_t. \end{aligned}$$

We have by Lemma A.5 that for all  $z \in \mathcal{V} = \mathcal{D} + \Sigma$ ,

$$\|z(\mathcal{D})\|_2 + \|z(\Sigma)\|_2 \geq \lambda(\mathcal{D}, \Sigma) \|z\|_2.$$

Let  $\lambda(\Sigma) \triangleq \min_{D \subset [d]} \lambda(\mathcal{D}, \Sigma)$ . Since there are finitely many subsets  $D$  of  $[d]$  (and corresponding sub-spaces  $\mathcal{D}$ ) and since for all such subsets,  $\lambda(\mathcal{D}, \Sigma) > 0$ , we have that  $\lambda(\Sigma) > 0$ . Further,

$$\|z(\mathcal{D})\|_2 + \|z(\Sigma)\|_2 \geq \lambda(\Sigma) \|z\|_2.$$

Therefore, it must be the case that either  $\|z(\mathcal{D})\|_2 \geq \frac{\lambda(\Sigma)}{2} \|z\|_2$  or  $\|z(\Sigma)\|_2 \geq \frac{\lambda(\Sigma)}{2} \|z\|_2$ . We divide our proof into the corresponding two cases:

1. The first case is when  $\|z(\Sigma)\|_2 \geq \frac{\lambda(\Sigma)}{2} \|z\|_2$ . Then, note that since  $z^\top \Delta_t \Delta_t^\top z \geq 0$  always, we have

$$\begin{aligned} \sum_t z^\top \bar{x}_t \bar{x}_t^\top z &\geq \sum_t z^\top x_t x_t^\top z + 2 \sum_t z^\top \Delta_t z^\top x_t \\ &= \sum_t z(\Sigma)^\top x_t x_t^\top z(\Sigma) + 2 \sum_t z^\top \Delta_t z^\top x_t, \end{aligned}$$

where the last equality follows from the fact that  $x_t \in \Sigma$  and  $z = z(\Sigma) + z(\Sigma^\perp)$ . By Lemma A.4, we get that for some constant  $C_1$  that depends only on  $\mathcal{C}$ ,

$$\begin{aligned} & \sum_t z^\top \bar{x}_t \bar{x}_t^\top z \\ & \geq \left( \lambda_r \tau(E) - 2rd \sqrt{\tau(E) \log(6r/\delta)} \right) \|z(\Sigma)\|_2^2 - C_1 d \sqrt{\tau(E) \log(6d/\delta)} \|z\|_2^2 \\ & \geq \left( \frac{\lambda(\Sigma) \lambda_r}{2} \tau(E) - \lambda(\Sigma) rd \sqrt{\tau(E) \log(6r/\delta)} - C_1 d \sqrt{\tau(E) \log(6d/\delta)} \right) \|z\|_2^2 \\ & \geq \left( \frac{\lambda(\Sigma) \lambda_r}{2} \tau(E) - \lambda(\Sigma) d^2 \sqrt{\tau(E) \log(6d/\delta)} - C_1 d \sqrt{\tau(E) \log(6d/\delta)} \right) \|z\|_2^2. \end{aligned}$$

(The second step assumes  $\lambda_r \tau(E) - 2rd \sqrt{\tau(E) \log(6r/\delta)} \geq 0$ . When this is negative, the bound trivially holds as  $\sum_t z^\top \bar{x}_t \bar{x}_t^\top z \geq 0$ .)

2. The second case arises when  $\|z(\mathcal{D})\|_2 \geq \frac{\lambda(\Sigma)}{2} \|z\|_2$ . Note that

$$\begin{aligned} \sum_t z^\top \bar{x}_t \bar{x}_t^\top z &\geq \sum_t z^\top \Delta_t \Delta_t^\top z + 2 \sum_t z^\top \Delta_t z^\top x_t \\ &= \sum_t z(\mathcal{D})^\top \Delta_t \Delta_t^\top z(\mathcal{D}) + 2 \sum_t z^\top \Delta_t z^\top x_t, \end{aligned}$$

as  $\Delta_t \in \mathcal{D}$  and  $z = z(\mathcal{D}) + z(\mathcal{D}^\perp)$ . By Lemma A.4, it follows that for some constants  $C_2, C_3$  that only depend on  $\mathcal{C}$ ,

$$\begin{aligned} &\sum_t z^\top \bar{x}_t \bar{x}_t^\top z \\ &\geq \left( n \min_{i,k} \left\{ \pi^i \left( \frac{B^i}{c^i(k)} \right)^2 \right\} - C_2 \sqrt{n \log(6d/\delta)} \right) \|z(\mathcal{D})\|_2^2 - C_3 d \sqrt{\tau(E) \log(6d/\delta)} \|z\|_2^2 \\ &\geq \left( \frac{\lambda(\Sigma)n}{2} \min_{i,k} \left\{ \pi^i \left( \frac{B^i}{c^i(k)} \right)^2 \right\} - \frac{\lambda(\Sigma)C_2}{2} \sqrt{n \log(6d/\delta)} - C_3 d \sqrt{\tau(E) \log(6d/\delta)} \right) \|z\|_2^2 \\ &\geq \left( \frac{\lambda(\Sigma)n}{2} \min_{i,k} \left\{ \pi^i \left( \frac{B^i}{c^i(k)} \right)^2 \right\} - \frac{\lambda(\Sigma)C_2}{2} \sqrt{\tau(E) \log(6d/\delta)} - C_3 d \sqrt{\tau(E) \log(6d/\delta)} \right) \|z\|_2^2. \end{aligned}$$

Noting that by definition  $\lambda_r > 0$  and  $\min_{i,k} \left\{ \pi^i \left( \frac{B^i}{c^i(k)} \right)^2 \right\} > 0$ , and picking the worse of the two above bounds on  $\sum_t z^\top \bar{x}_t \bar{x}_t^\top z$  concludes the proof with

$$\lambda = \frac{\lambda(\Sigma)}{2} \min \left( \lambda_r, \min_{i,k} \left\{ \pi^i \left( \frac{B^i}{c^i(k)} \right)^2 \right\} \right) > 0.$$

□

We can now prove Theorem 4.1. By Lemma A.2, we have that

$$\left( \bar{X}_{\tau(E)} (\mathcal{V}_{\tau(E)})^\top \bar{X}_{\tau(E)} (\mathcal{V}_{\tau(E)}) \right) \left( \hat{\beta}_E (\mathcal{V}_{\tau(E)}) - \beta^* (\mathcal{V}_{\tau(E)}) \right) = \bar{X}_{\tau(E)} (\mathcal{V}_{\tau(E)})^\top \varepsilon_{\tau(E)},$$

which immediately yields

$$\begin{aligned} &\left( \hat{\beta}_E (\mathcal{V}_{\tau(E)}) - \beta^* (\mathcal{V}_{\tau(E)}) \right)^\top \left( \bar{X}_{\tau(E)} (\mathcal{V}_{\tau(E)})^\top \bar{X}_{\tau(E)} (\mathcal{V}_{\tau(E)}) \right) \left( \hat{\beta}_E (\mathcal{V}_{\tau(E)}) - \beta^* (\mathcal{V}_{\tau(E)}) \right) \\ &= \left( \hat{\beta}_E (\mathcal{V}_{\tau(E)}) - \beta^* (\mathcal{V}_{\tau(E)}) \right)^\top \bar{X} (\mathcal{V}_{\tau(E)})^\top \varepsilon_{\tau(E)} \end{aligned}$$

by performing matrix multiplication with  $\left( \hat{\beta}_E (\mathcal{V}_{\tau(E)}) - \beta^* (\mathcal{V}_{\tau(E)}) \right)^\top$  on both sides on the first-order conditions. Further, by Lemma A.3, Corollary A.6, and a union bound, we get that with probability at least  $1 - \delta$ ,

$$\begin{aligned} &\left( \hat{\beta}_E (\mathcal{V}_{\tau(E)}) - \beta^* (\mathcal{V}_{\tau(E)}) \right)^\top \bar{X}_{\tau(E)} (\mathcal{V}_{\tau(E)})^\top \bar{X}_{\tau(E)} (\mathcal{V}_{\tau(E)}) \left( \hat{\beta}_E (\mathcal{V}_{\tau(E)}) - \beta^* (\mathcal{V}_{\tau(E)}) \right) \\ &\geq \left( \frac{\lambda n}{2} - \kappa' d^2 \sqrt{\tau(E) \log(12d/\delta)} \right) \left\| \hat{\beta}_E (\mathcal{V}_{\tau(E)}) - \beta^* (\mathcal{V}_{\tau(E)}) \right\|_2^2, \end{aligned}$$

and

$$\begin{aligned} &\left( \hat{\beta}_E (\mathcal{V}_{\tau(E)}) - \beta^* (\mathcal{V}_{\tau(E)}) \right)^\top \bar{X}_{\tau(E)} (\mathcal{V}_{\tau(E)})^\top \varepsilon \\ &\leq \left\| \hat{\beta}_E (\mathcal{V}_{\tau(E)}) - \beta^* (\mathcal{V}_{\tau(E)}) \right\|_2 \cdot K' \sqrt{d\tau(E) \log(4d/\delta)}. \end{aligned}$$

Combining the two above inequalities with the first-order conditions yields

$$\left\| \hat{\beta}_E (\mathcal{V}_{\tau(E)}) - \beta^* (\mathcal{V}_{\tau(E)}) \right\|_2 \leq \frac{K' \sqrt{d\tau(E) \log(4d/\delta)}}{\frac{\lambda n}{2} - \kappa' d^2 \sqrt{\tau(E) \log(12d/\delta)}}.$$

For

$$n \geq \frac{4\kappa' d^2}{\lambda} \sqrt{\tau(E) \log(12d/\delta)},$$

the bound becomes

$$\left\| \hat{\beta}_E (\mathcal{V}_{\tau(E)}) - \beta^* (\mathcal{V}_{\tau(E)}) \right\|_2 \leq \frac{4K' \sqrt{d\tau(E) \log(4d/\delta)}}{\lambda n}.$$

The proof concludes by letting  $K \triangleq 4K'$ ,  $\kappa \triangleq 4\kappa'$  and noting that since  $\mathcal{D}_{\tau(E)} \subset \mathcal{V}_{\tau(E)}$  by construction, the statement holds true over  $\mathcal{D}_{\tau(E)}$  (projecting onto a subspace cannot increase the  $\ell_2$ -norm).

### A.2.1 Proof of Lemma A.4

For the first statement, note that for all  $k \neq j \leq r$ ,

$$\mathbb{E} [f_k^\top x_t x_t^\top f_j] = f_k^\top \mathbb{E} [x_t x_t^\top] f_j = \lambda_j f_k^\top f_j,$$

as  $f_j$  is (by definition) an eigenvector of  $\Sigma = \mathbb{E} [x_t x_t^\top]$  for eigenvalue  $\lambda_j$ . Note that the  $f_j^\top x_t x_t^\top f_k = (f_j^\top x_t)(f_k^\top x_t)$  are random variables that are independent across  $t$ . Further, by Cauchy-Schwarz,

$$|(f_k^\top x_t)(f_j^\top x_t)| \leq \|f_k\|_2 \|f_j\|_2 \|x_t\|_2^2 = \|x_t\|_2^2 \leq d.$$

Therefore, we can apply Hoeffding with a union bound over the  $r^2$  choices of  $(f_k, f_j)$  to show that with probability at least  $1 - \delta'$ ,

$$\left| \sum_{t=1}^{\tau(E)} f_k^\top x_t x_t^\top f_j - \lambda_j \tau(E) f_k^\top f_j \right| \leq d \sqrt{2\tau(E) \log(2r^2/\delta')}.$$

Note now that for all  $z \in \Sigma$ , we can write  $z = \sum_{k=1}^r (z^\top f_k) f_k$ , and as such

$$\begin{aligned} & \left| \sum_{t=1}^{\tau(E)} z^\top x_t x_t^\top z - \sum_{k,j=1}^r (z^\top f_k)(z^\top f_j) \lambda_j \tau(E) f_k^\top f_j \right| \\ &= \left| \sum_{t=1}^{\tau(E)} \sum_{k,j=1}^r (z^\top f_k)(z^\top f_j) f_k^\top x_t x_t^\top f_j - \sum_{k,j=1}^r (z^\top f_k)(z^\top f_j) \lambda_j \tau(E) f_k^\top f_j \right| \\ &= \left| \sum_{k,j=1}^r (z^\top f_k)(z^\top f_j) \left( \sum_t f_k^\top x_t x_t^\top f_j - \lambda_j \tau(E) f_k^\top f_j \right) \right| \\ &\leq d \sqrt{2\tau(E) \log(2r^2/\delta')} \sum_{k,j=1}^r |z^\top f_k| |z^\top f_j| \\ &\leq rd \sqrt{2\tau(E) \log(2r^2/\delta')} \|z\|_2^2, \end{aligned}$$

where the last step follows from the fact that by Cauchy-Schwarz,

$$\sum_{k=1}^r |z^\top f_k| \leq \sqrt{\sum_{k=1}^r 1^2} \sqrt{\sum_{k=1}^r (z^\top f_k)^2} = \sqrt{r} \|z\|_2.$$

Hence, for  $z \in \Sigma$ , remembering  $f_k^\top f_j = 0$  when  $k \neq j$  and  $f_k^\top f_k = 1$ , and noting  $\|z\|_2^2 = \sum_{k=1}^r (z^\top f_k)^2$ , we get that

$$\begin{aligned}
 \sum_{t=1}^{\tau(E)} z^\top x_t x_t^\top z &\geq \sum_{k,j=1}^r (z^\top f_k)(z^\top f_j) \lambda_j \tau(E) f_k^\top f_j - rd \sqrt{2\tau(E) \log(2r^2/\delta')} \|z\|_2^2 \\
 &= \sum_{k=1}^r \lambda_k \tau(E) (z^\top f_k)^2 - rd \sqrt{2\tau(E) \log(2r^2/\delta')} \|z\|_2^2 \\
 &\geq \lambda_r \tau(E) \sum_{k=1}^r (z^\top f_k)^2 - rd \sqrt{2\tau(E) \log(2r^2/\delta')} \|z\|_2^2 \\
 &= \left( \lambda_r \tau(E) - 2rd \sqrt{\tau(E) \log(2r/\delta')} \right) \|z\|_2^2.
 \end{aligned}$$

For the second statement, we remind the reader that the costs of modification are such that  $|\Delta_t(k)^2| \leq \left( \max_{i,j} \left\{ \frac{B^i}{c^i(j)} \right\} \right)^2$ , and that within any epoch  $\phi$ , the  $\Delta_t$ 's are independent of each other. We can therefore apply Hoeffding's inequality and a union bound (over  $k \in D_{\tau(E)} \subset [d]$ ) to show that with probability at least  $1 - \delta'$ , for any  $k \in D_{\tau(E)}$ , there exists an epoch  $\phi(k) \leq E$  (pick any  $\phi$  in which  $k$  is modified) such that

$$\begin{aligned}
 \sum_{t \in \phi(k)} e_k^\top \Delta_t \Delta_t^\top e_k &\geq n \mathbb{E} [\Delta_t(k)^2] - \left( \max_{i,j} \left\{ \frac{B^i}{c^i(j)} \right\} \right)^2 \sqrt{2n \log(d/\delta')} \\
 &\geq n \min_{i \in [l], j \in [d]} \left\{ \pi^i \left( \frac{B^i}{c^i(j)} \right)^2 \right\} - \left( \max_{i,j} \left\{ \frac{B^i}{c^i(j)} \right\} \right)^2 \sqrt{2n \log(d/\delta')}.
 \end{aligned}$$

The last inequality holds noting that  $k$  can be modified in period  $\phi(k)$  only if there exists a cost type  $i$  on the support of  $\mathcal{C}$  such that  $k$  is a best response to  $\hat{\beta}_{\phi(k)-1}$ ; in turn,  $k$  is modified with probability  $\pi^i$  by amount  $\Delta(k) = B^i/c^i(k)$ , leading to

$$\mathbb{E} [\Delta_t(k)^2] \geq \pi^i \left( \frac{B^i}{c^i(k)} \right)^2.$$

Since  $\Delta_t(k)\Delta_t(j) = 0$  when  $k \neq j$  as a single direction is modified at a time, note that for all  $z \in \mathcal{D}_{\tau(E)}$ , we have

$$\begin{aligned}
 &\sum_{t \leq \tau(E)} z^\top \Delta_t \Delta_t^\top z \\
 &= \sum_{t \leq \tau(E)} \sum_{k=1}^d \Delta_t(k)^2 z^\top e_k e_k^\top z \\
 &= \sum_{k=1}^d \sum_{t \leq \tau(E)} \Delta_t(k)^2 (z^\top e_k)^2 \\
 &\geq \sum_{k \in D_{\tau(E)}} \sum_{t \in \phi(k)} \Delta_t(k)^2 (z^\top e_k)^2 \\
 &\geq \sum_{k \in D_{\tau(E)}} \left( n \min_{i \in [l], j \in [d]} \left\{ \pi^i \left( \frac{B^i}{c^i(j)} \right)^2 \right\} - \left( \max_{i,j} \left\{ \frac{B^i}{c^i(j)} \right\} \right)^2 \sqrt{2n \log(d/\delta')} \right) (z^\top e_k)^2 \\
 &= \left( n \min_{i \in [l], j \in [d]} \left\{ \pi^i \left( \frac{B^i}{c^i(j)} \right)^2 \right\} - \left( \max_{i,j} \left\{ \frac{B^i}{c^i(j)} \right\} \right)^2 \sqrt{2n \log(d/\delta')} \right) \sum_{k \in D_{\tau(E)}} (z^\top e_k)^2.
 \end{aligned}$$

For  $z \in \mathcal{D}_{\tau(E)}$ ,  $\sum_{k \in D_{\tau(E)}} (z^\top e_k)^2 = \|z\|_2^2$ , and the second inequality immediately holds.

Finally, let us prove the last inequality. Take  $(k, j) \in [d]^2$ , and let us write  $W_t = e_k^\top x_t \Delta_t^\top e_j$ . First, note that  $x_t$  and  $\Delta_t$  are independent: in epoch  $\phi$ , the distribution of  $\Delta_t$  is a function of  $\hat{\beta}_{\phi-1}$  (and  $\mathcal{C}$ ) only, which only



depends on the realizations of  $x$ ,  $\varepsilon$ ,  $\Delta$  in previous time steps. Further,  $x_t$  is independent of the history of features and modifications up until time  $t - 1$  included. Hence, it must be the case that

$$\begin{aligned}\mathbb{E}[W_t | W_{t-1}, \dots, W_1] &= \mathbb{E}[\mathbb{E}[e_k^\top x_t | \Delta_t, W_{t-1}, \dots, W_1] \Delta_t^\top e_j | W_{t-1}, \dots, W_1]] \\ &= \mathbb{E}[\mathbb{E}[e_k^\top x_t] \Delta_t^\top e_j | W_{t-1}, \dots, W_1]] \\ &= \mathbb{E}[e_k^\top x_t] \cdot \mathbb{E}[\Delta_t^\top e_j | W_{t-1}, \dots, W_1]] \\ &= 0,\end{aligned}$$

where the last equality follows from the fact that  $\mathbb{E}[x_t] = 0$ . Further,

$$|e_k^\top x_t \Delta_t^\top e_j| = |x_t(k)| |\Delta_t(j)| \leq \max_{i,k} \left\{ \frac{B^i}{c^i(k)} \right\}.$$

We can therefore apply Lemma A.1 and a union bound over all  $(k, j) \in [d]^2$  to show that with probability at least  $1 - \delta'$ ,

$$\left| \sum_{t=1}^{\tau(E)} e_k^\top x_t \Delta_t^\top e_j \right| \leq \max_{i,k} \left\{ \frac{B^i}{c^i(k)} \right\} \sqrt{2\tau(E) \log(2d^2/\delta')}.$$

In particular, we get that for all  $z \in \mathbb{R}^d$ ,

$$\begin{aligned}\left| \sum_{t \in E} z^\top x_t \Delta_t^\top z \right| &= \left| \sum_{k,j} \sum_{t \in E} (z^\top e_k)(z^\top e_j) e_k^\top x_t \Delta_t^\top e_j \right| \\ &\leq \sum_{k,j} |z^\top e_k| |z^\top e_j| \left| \sum_{t \in E} e_k^\top x_t \Delta_t^\top e_j \right| \\ &\leq \max_{i,k} \left\{ \frac{B^i}{c^i(k)} \right\} \sqrt{2\tau(E) \log(2d^2/\delta')} \left( \sum_k |z^\top e_k| \right)^2 \\ &\leq 2d \max_{i,k} \left\{ \frac{B^i}{c^i(k)} \right\} \sqrt{\tau(E) \log(2d/\delta')} \|z\|_2^2,\end{aligned}$$

where the last step follows from the fact that by Cauchy-Schwarz,

$$\left( \sum_k |z^\top e_k| \right)^2 = \left( \sum_k |z(k)| \right)^2 \leq \sum_k 1^2 \cdot \sum_k z(k)^2 = d \cdot \|z\|_2^2.$$

We conclude the proof with a union bound over all three inequalities, taking  $\delta' = 3\delta$ .

## B Proof of Theorem 5.2

We drop the  $\tau(E)$  subscripts when clear from context. We first note that  $\hat{\beta}_E$  is a least-square solution.

**Claim B.1.**

$$\hat{\beta}_E \in LSE(\tau(E)).$$

*Proof.* This follows immediately from noting that

$$\left( \bar{X} \hat{\beta}_E - \bar{Y} \right)^\top \left( \bar{X} \hat{\beta}_E - \bar{Y} \right) = \left( \bar{X} \beta_E - \bar{Y} \right)^\top \left( \bar{X} \beta_E - \bar{Y} \right),$$

as  $\bar{X}^\top v = \bar{X}(\mathcal{U})^\top v = 0$  by definition of  $\mathcal{U}$ , and since  $v \in \mathcal{U}^\perp$ .  $\square$

Second, we show that  $\hat{\beta}_E$  has large norm:

**Claim B.2.**

$$\left\| \hat{\beta}_E \right\|_2 \geq \alpha.$$

*Proof.* First, we note that necessarily,  $\beta_E \in \mathcal{U}_{\tau(E)}$ . Suppose not, then we can write

$$\beta_E = \beta_E(\mathcal{U}_{\tau(E)}) + \beta_E(\mathcal{U}_{\tau(E)}^\perp),$$

with  $\beta_E(\mathcal{U}_{\tau(E)}^\perp) \neq 0$ . By the same argument as in Claim B.1,  $\beta_E(\mathcal{U}_{\tau(E)})$  is a least-square solution. Using orthogonality of  $\mathcal{U}_{\tau(E)}$  and  $\mathcal{U}_{\tau(E)}^\perp$  and the fact that  $\left\| \beta_E(\mathcal{U}_{\tau(E)}^\perp) \right\|_2 > 0$ , we have

$$\|\beta_E\|^2 = \|\beta_E(\mathcal{U}_{\tau(E)})\|_2^2 + \|\beta_E(\mathcal{U}_{\tau(E)}^\perp)\|_2^2 > \|\beta_E(\mathcal{U}_{\tau(E)})\|_2^2.$$

This contradicts  $\beta_E$  being a minimum norm least-square solution. Hence, it must be the case that  $\beta_E \in \mathcal{U}_{\tau(E)}$ . Since  $v \in \mathcal{U}_{\tau(E)}^\perp$ , we have that  $\beta_E$  and  $v$  are orthogonal with  $\|v\|_2 = 1$ , implying

$$\left\| \hat{\beta}_E \right\|_2^2 = \|\beta_E\|_2^2 + \alpha^2 \|v\|_2^2 \geq \alpha^2.$$

This concludes the proof.  $\square$

We argue that such a solution places a large amount of weight on currently unexplored features:

**Lemma B.3.** *At time  $\tau(E)$ , suppose  $\text{rank}(\mathcal{U}_{\tau(E)}) \leq [d]$ . Suppose  $n \geq \frac{\kappa d^2}{\lambda} \sqrt{\tau(E) \log(12d/\delta')}$ . Take any  $\alpha$  with*

$$\alpha \geq \gamma \left( \sqrt{d} + \frac{Kd\sqrt{T \log(4d/\delta')}}{\lambda n} \right),$$

where  $\gamma$  is a constant that depends only on  $\mathcal{C}$ . With probability at least  $1 - \delta'$ , there exists  $i \in [l]$  and a feature  $k \notin D_{\tau(E)}$  with

$$\frac{|\hat{\beta}_E(k)|}{c^i(k)} > \frac{|\hat{\beta}_E(j)|}{c^i(j)}, \quad \forall j \in D_{\tau(E)}.$$

*Proof.* Since  $\hat{\beta}_E \in LSE(\tau(E))$ , it must be by Theorem 4.1 that with probability at least  $1 - \delta'$ ,

$$\begin{aligned} \sqrt{\sum_{k \in D} (\hat{\beta}_E(k) - \beta^*(k))^2} &\leq \frac{K\sqrt{d\tau(E) \log(4d/\delta')}}{\lambda n} \\ &\leq \frac{K\sqrt{dT \log(4d/\delta')}}{\lambda n}. \end{aligned} \tag{4}$$

First, since  $z \rightarrow \sqrt{\sum_{k \in D} z(k)^2}$  defines a norm (in fact, the  $\ell_2$ -norm in  $\mathbb{R}^{|D|}$ ), it must be the case that

$$\sqrt{\sum_{k \in D} (z(k) - z'(k))^2} \geq \sqrt{\sum_{k \in D} z(k)^2} - \sqrt{\sum_{k \in D} z'(k)^2}.$$

In turn, plugging this in Equation (4), we obtain

$$\begin{aligned} \sqrt{\sum_{k \in D} \hat{\beta}_E(k)^2} &\leq \sqrt{\sum_{k \in D} \beta^*(k)^2} + \frac{K\sqrt{dT \log(4d/\delta')}}{\lambda n} \\ &\leq \|\beta^*\|_2 + \frac{K\sqrt{dT \log(4d/\delta')}}{\lambda n} \\ &\leq \sqrt{d} + \frac{K\sqrt{dT \log(4d/\delta')}}{\lambda n}. \end{aligned}$$

By the triangle inequality and the lemma's assumption, we also have that

$$\sqrt{\sum_{k \in D} \hat{\beta}_E(k)^2} + \sqrt{\sum_{k \notin D} \hat{\beta}_E(k)^2} \geq \|\hat{\beta}_E\|_2 \geq \alpha.$$

Combining the last two equations, we obtain

$$\sqrt{d} + \frac{K\sqrt{dT \log(4d/\delta')}}{\lambda n} + \sqrt{\sum_{k \notin D} \hat{\beta}_E(k)^2} \geq \alpha$$

which implies that for  $\alpha \geq \gamma \left( \sqrt{d} + \frac{Kd\sqrt{T \log(4d/\delta')}}{\lambda n} \right)$ , we have:

$$\begin{aligned} \sqrt{\sum_{k \notin D} \hat{\beta}_E(k)^2} &\geq \alpha - \sqrt{d} - \frac{K\sqrt{dT \log(4d/\delta')}}{\lambda n} \\ &\geq \alpha - \sqrt{d} - \frac{K\sqrt{dT \log(4d/\delta')}}{\lambda n} \\ &\geq \sqrt{d}(\gamma - 1) \left( 1 + \frac{K\sqrt{dT \log(4d/\delta')}}{\lambda n} \right). \end{aligned}$$

Second, note that Equation (4) implies immediately that for any  $j \in D_T$ ,

$$\left| \hat{\beta}_E(j) - \beta^*(j) \right| \leq \frac{K\sqrt{dT \log(4d/\delta')}}{\lambda n},$$

and in turn,

$$\left| \hat{\beta}_E(j) \right| \leq |\beta^*(j)| + \frac{K\sqrt{dT \log(4d/\delta')}}{\lambda n} \leq 1 + \frac{K\sqrt{dT \log(4d/\delta')}}{\lambda n}.$$

Therefore,

$$\sqrt{\sum_{k \notin D} \hat{\beta}_E(k)^2} \geq \sqrt{d}(\gamma - 1) \max_{j \in D} \hat{\beta}_E(j).$$

Hence, there must exist feature  $k \notin D$  with

$$\left| \hat{\beta}_E(k) \right| \geq (\gamma - 1) \max_{j \in D} \hat{\beta}_E(j).$$

Picking  $\gamma$  such that for some  $i \in [l]$ ,

$$\gamma - 1 \geq \max_{j \in D} \frac{c^i(k)}{c^i(j)}$$

yields the result immediately.  $\square$

The proof of Theorem 5.2 follows directly from Lemma B.3 and a union bound over the first  $d$  epochs. With probability at least  $1 - d\delta'$ , for every epoch  $E \in [d]$ , there is a feature  $k \notin D_{\tau(E)}$  such that for some  $i \in [l]$ ,

$$\frac{\left| \hat{\beta}_E(k) \right|}{c^i(k)} > \frac{\left| \hat{\beta}_E(j) \right|}{c^i(j)} \quad \forall j \in D_{\tau(E)}.$$

This implies that there exists  $k \in D_{\tau(E+1)}$  but  $k \notin D_{\tau(E)}$ . Applying this  $d$  times, we have that if  $T \geq dn$ , necessarily  $D_T = [d]$ . We can then apply Theorem 4.1 to then show that with probability at least  $1 - \delta'$

$$\left\| \hat{\beta}_{T/n} - \beta^* \right\|_2 \leq \frac{K\sqrt{dT \log(4d/\delta')}}{\lambda n}.$$

Taking a union bound over the two above events and  $\delta = 2d\delta'$ , we get the theorem statement with probability at least  $1 - \delta' (d + 1) \geq 1 - \delta$ .
